# Supplementary material
Source: HighWire-hosted journal article supplement (http://d2538ggaoe6cji.cloudfront.net/highwire/filestream/45076/field_highwire_adjunct_files/1/151662-2.pdf)

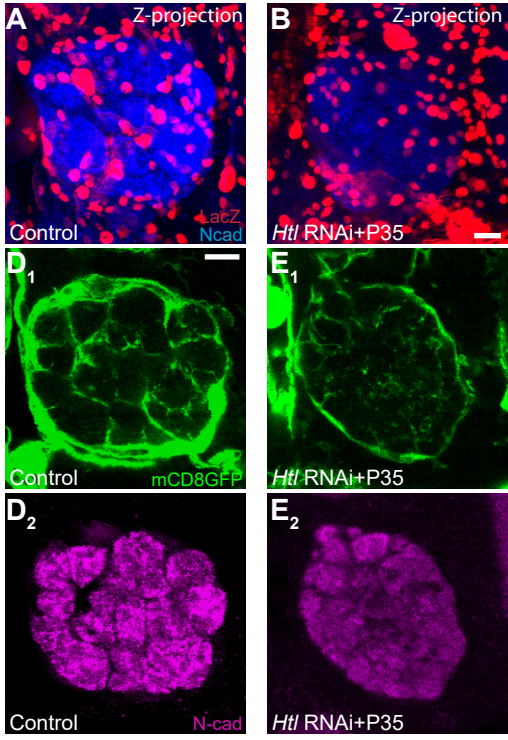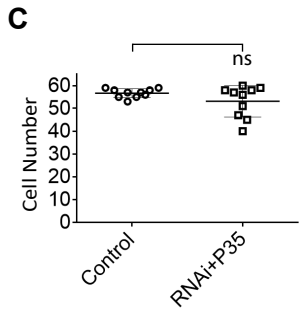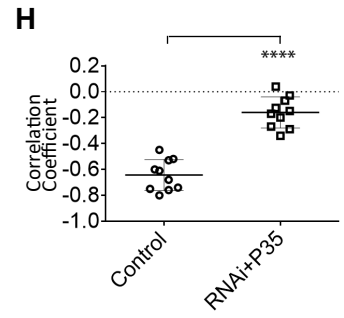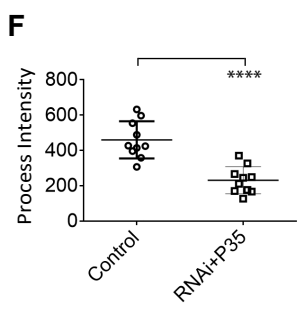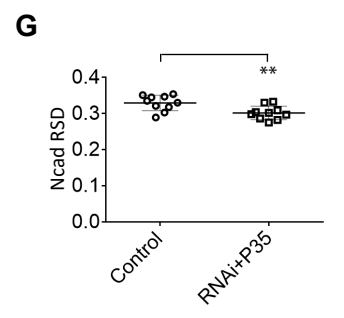

Supplement: 151662-2.pdf [file 151662-2.pdf]
